# Supplementary material for: Fabrication of two 5-R-isophthalic acid-modulated Cu-based coordination polymers as urease inhibitors
Source: Royal Society of Chemistry journal article supplement (doi:10.1039/d3ce01109g), 2023-12-04
Supplement: d3ce01109g1.pdf [file d3ce01109g1.pdf]

## Fabrication of 5-R-isophthalic acid-modulated two Cu-based coordination polymers as urease inhibitors

Wen-Long Duan<sup>a</sup>, Ming-Yue Yan<sup>a</sup>, Feng Yan<sup>a\*</sup>, and Jian Luan<sup>a\*</sup>

<sup>a</sup> College of Science, Shenyang University of Chemical Technology, Shenyang, 110142, P. R. China

E-mails: [yanfeng@syuct.edu.cn](mailto:yanfeng@syuct.edu.cn) (F. Yan), [2010044@stu.neu.edu.cn](mailto:2010044@stu.neu.edu.cn) (J. Luan)

**Table S1** Crystallographic data for **Cu-CP-COOH** and **Cu-CP-NO<sub>2</sub>**.

| Complex                                  | Cu-CP-COOH                                                      | Cu-CP-NO <sub>2</sub>                                                          |
|------------------------------------------|-----------------------------------------------------------------|--------------------------------------------------------------------------------|
| Empirical formula                        | C <sub>27</sub> H <sub>18</sub> CuN <sub>4</sub> O <sub>9</sub> | C <sub>34</sub> H <sub>24</sub> Cu <sub>2</sub> N <sub>6</sub> O <sub>17</sub> |
| Formula weight                           | 605.99                                                          | 915.69                                                                         |
| Temperature/K                            | 296.0                                                           | 296.0                                                                          |
| Crystal system                           | Monoclinic                                                      | Monoclinic                                                                     |
| Space group                              | <i>P21/n</i>                                                    | <i>Pnma</i>                                                                    |
| a/Å                                      | 5.1004(7)                                                       | 13.3687(6)                                                                     |
| b/Å                                      | 20.907(3)                                                       | 19.6383(9)                                                                     |
| c/Å                                      | 21.437(3)                                                       | 12.8093(5)                                                                     |
| α/°                                      | 90                                                              | 90                                                                             |
| β/°                                      | 94.484(4)                                                       | 90                                                                             |
| γ/°                                      | 90                                                              | 90                                                                             |
| Volume/Å <sup>3</sup>                    | 2279.0(5)                                                       | 3362.9(3)                                                                      |
| Z                                        | 4                                                               | 4                                                                              |
| ρ <sub>calc</sub> /g cm <sup>-3</sup>    | 1.766                                                           | 1.809                                                                          |
| μ/mm <sup>-1</sup>                       | 1.031                                                           | 1.360                                                                          |
| F(000)                                   | 1236                                                            | 1856.0                                                                         |
| R <sub>int</sub>                         | 0.0927                                                          | 0.0402                                                                         |
| s                                        | 1.020                                                           | 1.000                                                                          |
| R <sub>f</sub> /wR <sub>f</sub>          | 0.0763/0.2069                                                   | 0.0420/0.1094                                                                  |
| All data R <sub>f</sub> /wR <sub>f</sub> | 0.1570/0.2602                                                   | 0.0799/0.1094                                                                  |

<sup>a</sup>  $R_1 = \Sigma||F_o| - |F_c|| / \Sigma|F_o|$ , <sup>b</sup>  $wR_2 = \Sigma[w(F_o^2 - F_c^2)^2] / \Sigma[w(F_o^2)]^{1/2}$ .

**Table S2** Selected bond distances (Å) and angles (°) for **Cu-CP-COOH**.

---

|                   |            |                     |            |
|-------------------|------------|---------------------|------------|
| Cu(1)–O(1)        | 1.938(3)   | Cu(1)–N(1)          | 2.055(4)   |
| Cu(1)–O(4)#1      | 1.953(3)   | Cu(1)–N(2)#2        | 2.068(4)   |
| O(1)–Cu(1)–O(4)#1 | 176.45(14) | O(1)–Cu(1)–N(2)#2   | 88.92(13)  |
| O(1)–Cu(1)–N(1)   | 91.00(13)  | O(4)#1–Cu(1)–N(2)#2 | 90.43(13)  |
| O(4)#1–Cu(1)–N(1) | 90.18(13)  | N(1)–Cu(1)–N(2)#2   | 171.16(15) |

Symmetry codes: #1  $-x + 1/2, y + 1/2, -z + 1/2$ ; #2  $x - 3/2, -y + 1/2, z + 1/2$ .

---

**Table S3** Selected bond distances (Å) and angles (°) for **Cu-CP-NO<sub>2</sub>**.

---

|                  |            |                    |          |
|------------------|------------|--------------------|----------|
| Cu(1)–O(1W)      | 1.967(2)   | Cu(1)–O(3)         | 1.969(2) |
| Cu(1)–O(1)       | 1.9769(19) | Cu(1)–N(1)         | 2.011(2) |
| Cu(1)–O(7)#1     | 2.360(2)   | O(1W)–Cu(1)–O(3)   | 89.32(8) |
| O(1W)–Cu(1)–O(1) | 87.77(8)   | O(1W)–Cu(1)–O(7)#1 | 93.77(7) |
| O(3)–Cu(1)–O(1)  | 176.78(8)  | O(3)–Cu(1)–O(7)#1  | 92.18(8) |
| O(1W)–Cu(1)–N(1) | 176.76(9)  | O(1)–Cu(1)–O(7)#1  | 86.64(8) |
| O(3)–Cu(1)–N(1)  | 92.13(9)   | N(1)–Cu(1)–O(7)#1  | 89.07(9) |
| O(1)–Cu(1)–N(1)  | 90.86(9)   |                    |          |

Symmetry code: #1  $x - 1/2, y, -z + 3/2$ .

---

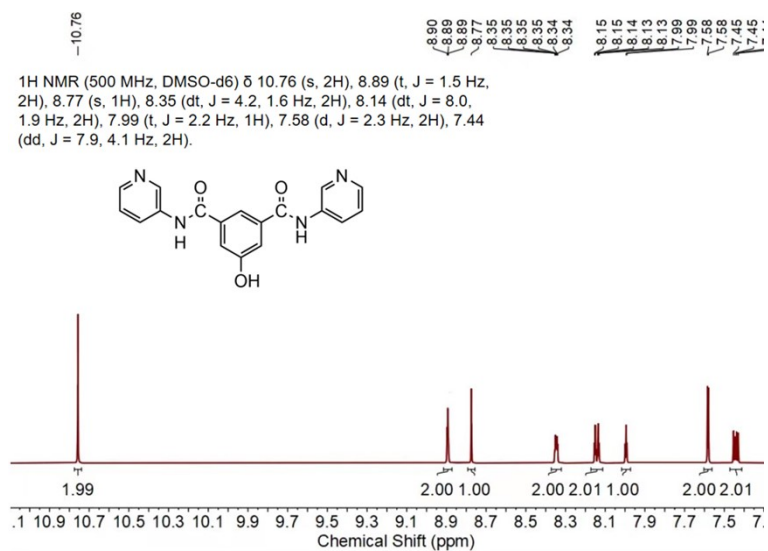

**Fig. S1** NMR spectra of the 3-dpip ligand.

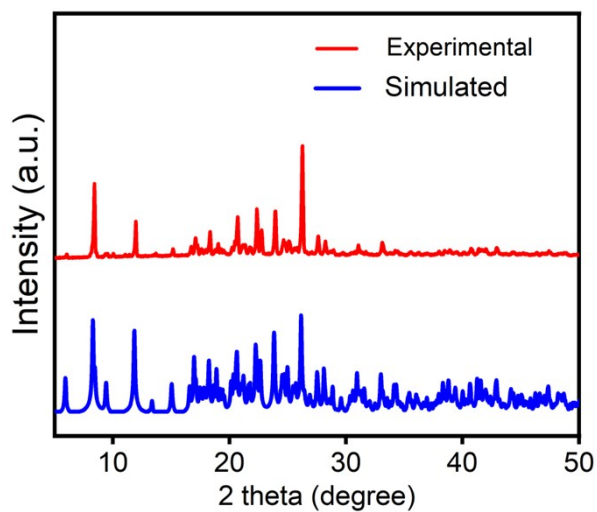

**Fig. S2** The PXRD pattern of Cu-CP-COOH.

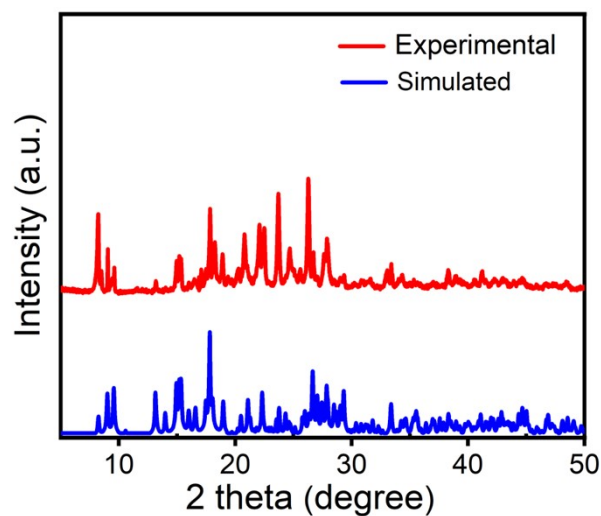

**Fig. S3** The PXRD pattern of Cu-CP-NO<sub>2</sub>.

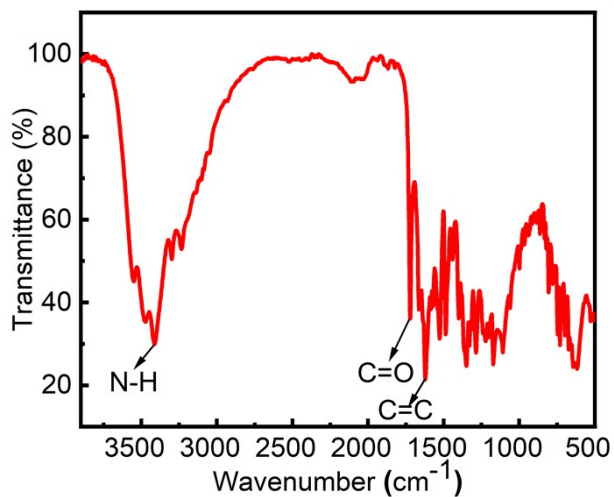

**Fig. S4** The IR spectrum of **Cu-CP-COOH**.

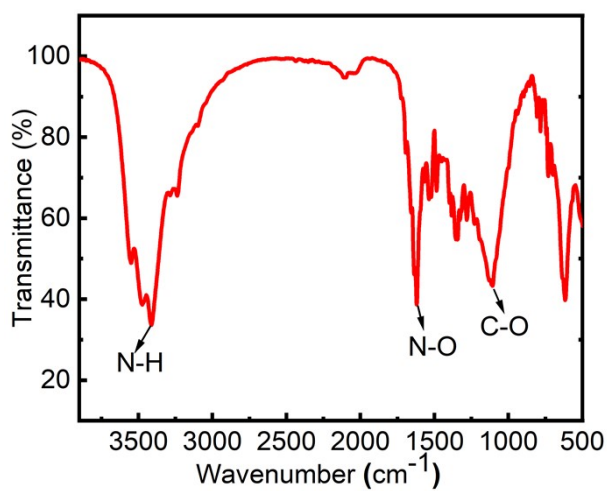

**Fig. S5** The IR spectrum of **Cu-CP-NO<sub>2</sub>**.

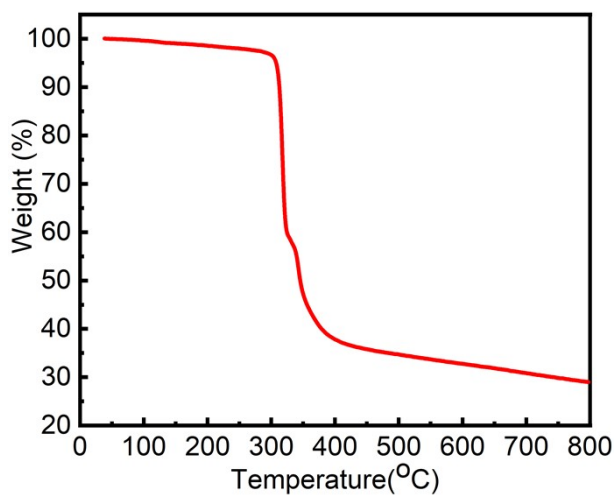

**Fig. S6** TGA curve of **Cu-CP-COOH**.

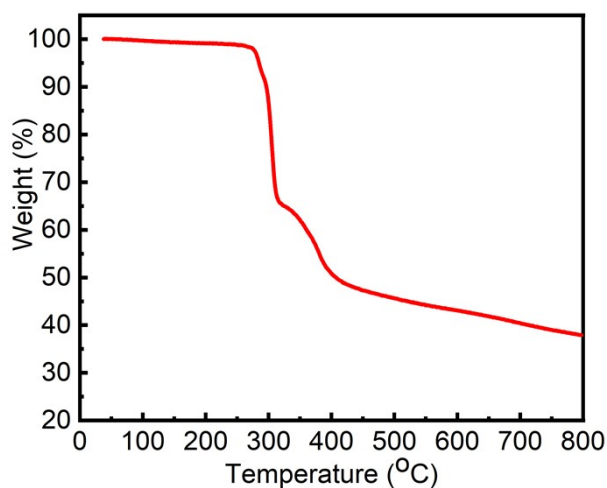

**Fig. S7** TGA curve of Cu-CP-NO<sub>2</sub>.

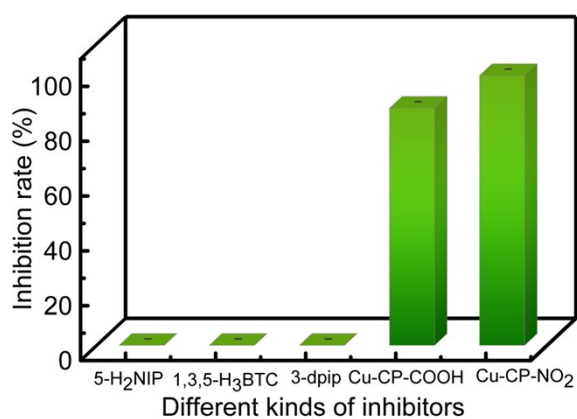

**Fig. S8** Inhibition of urease by Cu-CPs and ligands at the concentration of 100 μM.

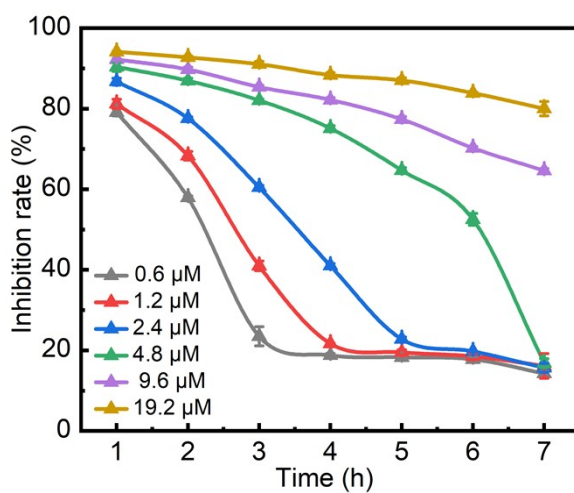

**Fig. S9** Inhibitory activity curves of Cu-CP-COOH from the concentration of 0.6 μM to 19.2 μM.

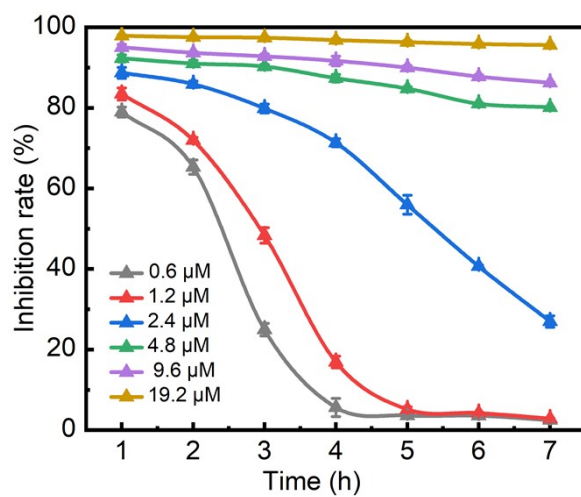

**Fig. S10** Inhibitory activity curves of **Cu-CP-NO<sub>2</sub>** from the concentration of 0.6 μM to 19.2 μM.
